# Supplementary material for: Metabolite Profiling of Alocasia gigantea Leaf Extract and Its Potential Anticancer Effect through Autophagy in Hepatocellular Carcinoma
Source: MDPI journal article supplement (doi:10.3390/molecules27238504), 2022-12-03
Supplement: s1 [file s1]

# Metabolite profiling of *Alocasia gigantea* leaves extract and its potential anticancer effect through autophagy in hepatocellular carcinoma

Hend Okasha<sup>1</sup>, Tarek Aboushousha<sup>2</sup>, Manuel A. Coimbra<sup>3</sup>, Susana M. Cardoso<sup>3,\*</sup> and Mosad A. Ghareeb<sup>4,\*</sup>

<sup>1</sup> Department of Biochemistry and Molecular Biology, Theodor Bilharz Research Institute, Kornaish El Nile, Warrak El-Hadar, Imbaba (P.O. 30), Giza 12411, Egypt

<sup>2</sup> Department of Pathology, Theodor Bilharz Research Institute, Kornaish El Nile, Warrak El-Hadar, Imbaba (P.O. 30), Giza 12411, Egypt

<sup>3</sup> LAQV-REQUIMTE & Department of Chemistry, University of Aveiro, Aveiro 3810-193, Portugal

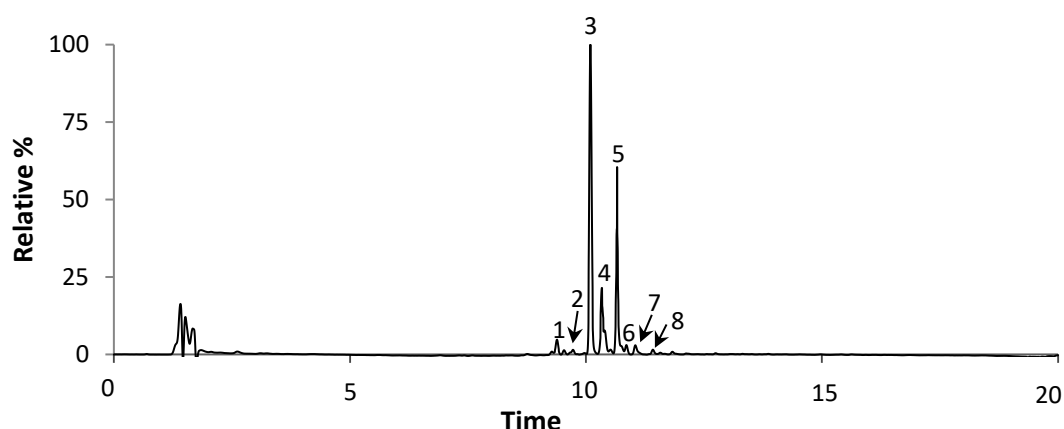

**Figure S1.** UHPLC- chromatogram (at 280 nm) of *A. gigantea* defatted methanolic extract in negative ion mode. Peak numbers correspond to those in Table 1.
